# Supplementary material for: Neurophysiological Changes Induced by Music-Supported Therapy for Recovering Upper Extremity Function after Stroke: A Case Series
Source: MDPI journal article supplement (doi:10.3390/brainsci11050666), 2021-05-20
Supplement: s1 [file s1]

Table S1. Demonstrates the performance on subsets of Jebsen hand function test.

| Jebsen Hand Function<br>Test subsets | P1   |      |      |      |      |      | P2   |      |      |      |      |      |
|--------------------------------------|------|------|------|------|------|------|------|------|------|------|------|------|
|                                      | Base | Pre  | Post | %    | F-up | %    | Base | Pre  | Post | %    | F-up | %    |
| Subset 2                             | 8.3  | 7.1  | 6.3  | -18% | 5.7  | -26% | 14.4 | 15.0 | 12.9 | -12% | 11.8 | -20% |
| Subset 3                             | 16.2 | 16.3 | 12.0 | -26% | 10.2 | -37% | 23.2 | 19.9 | 18.5 | -14% | 19.9 | -8%  |
| Subset 4                             | 13.7 | 9.3  | 10.4 | -10% | 11.6 | 1%   | 18.9 | 17.2 | 14.7 | -19% | 16.0 | -11% |
| Subset 5                             | 5.8  | 6.8  | 7.7  | 22%  | 5.4  | -14% | 17.6 | 16.2 | 15.8 | -7%  | 13.9 | -18% |
| Subset 6                             | 5.6  | 5.2  | 5.3  | -2%  | 5.1  | -6%  | 13.2 | 11.3 | 8.4  | -31% | 7.2  | -41% |
| Subset 7                             | 5.4  | 5.9  | 5.1  | -10% | 4.7  | -17% | 8.7  | 8.0  | 5.9  | -29% | 6.6  | -21% |

Subset 2: turning over a 3×5-inch card, Subset 3: picking up small common objects, Subset 4: simulated feeding, Subset 5: stacking checkers, Subset 6: picking up large light cans, Subset 7: picking up large heavy cans, F-up: Follow up

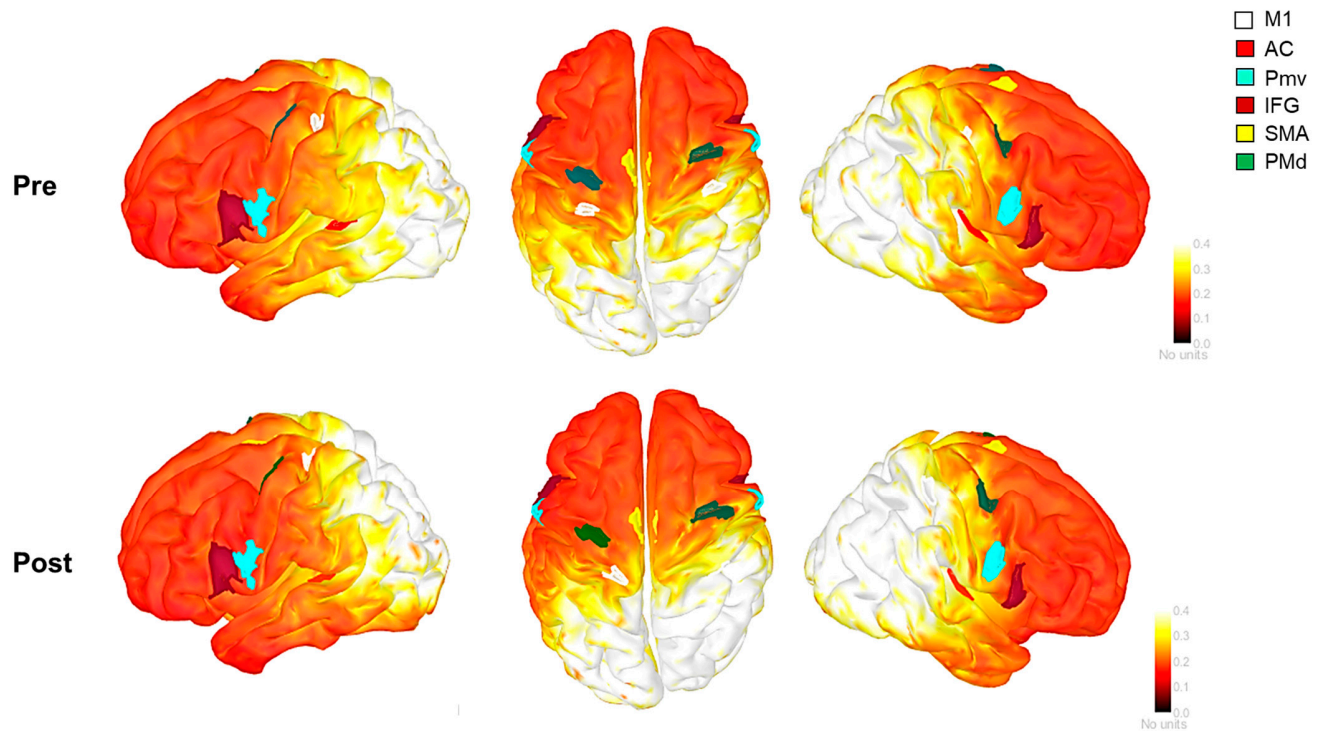

Figure S1. Relative power spectrum density maps for  $\alpha$ -band in Participant 1. (M1: primary motor cortex, AC: auditory cortex, IFG: inferior frontal gyrus, SMA: supplementary motor area: PMv: premotor ventral cortex, PMd: premotor dorsal cortex, pre: before music support training, post: after music supported training, post-pre: difference in PSD for the post MST phase and the pre MST phase)

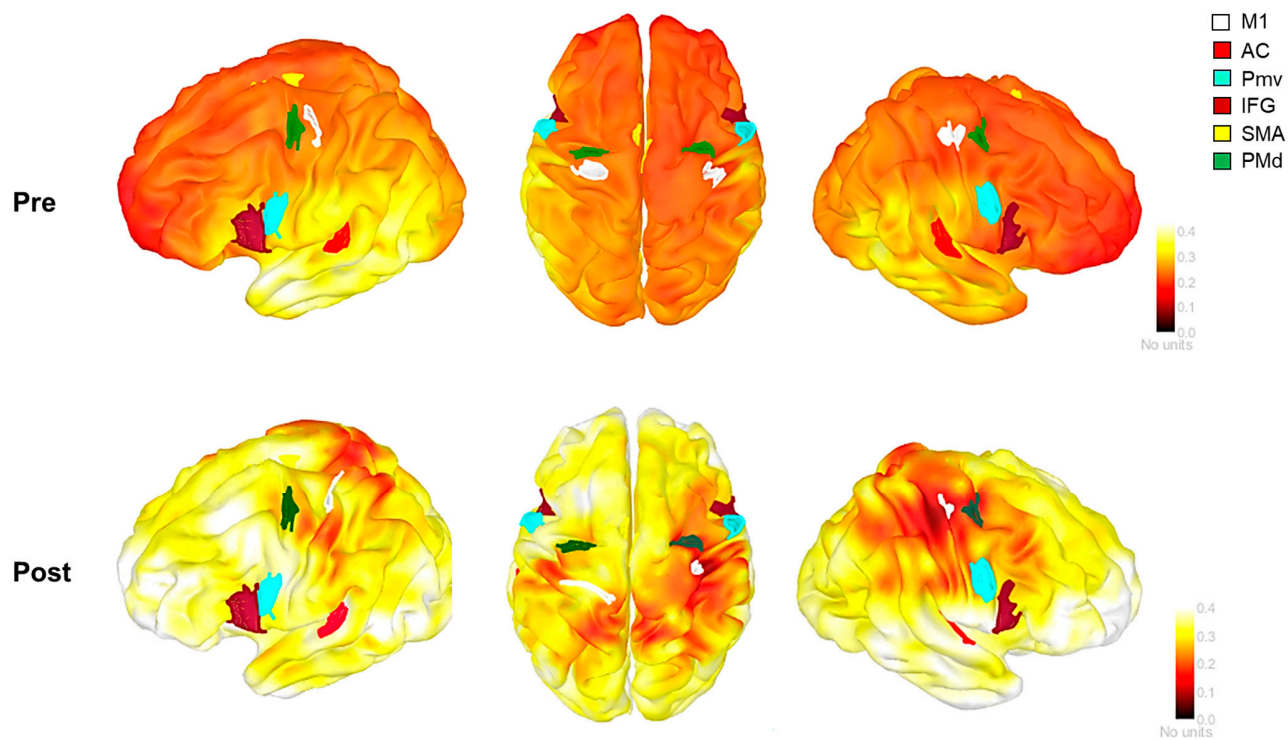

Figure S2. Relative power spectrum density maps for  $\alpha$ -band in Participant 2. (M1: primary motor cortex, AC: auditory cortex, IFG: inferior frontal gyrus, SMA: supplementary motor area, PMv: premotor ventral cortex, PMd: premotor dorsal cortex, pre: before music support training, post: after music supported training, post-pre: difference in PSD for the post MST phase and the pre MST phase).

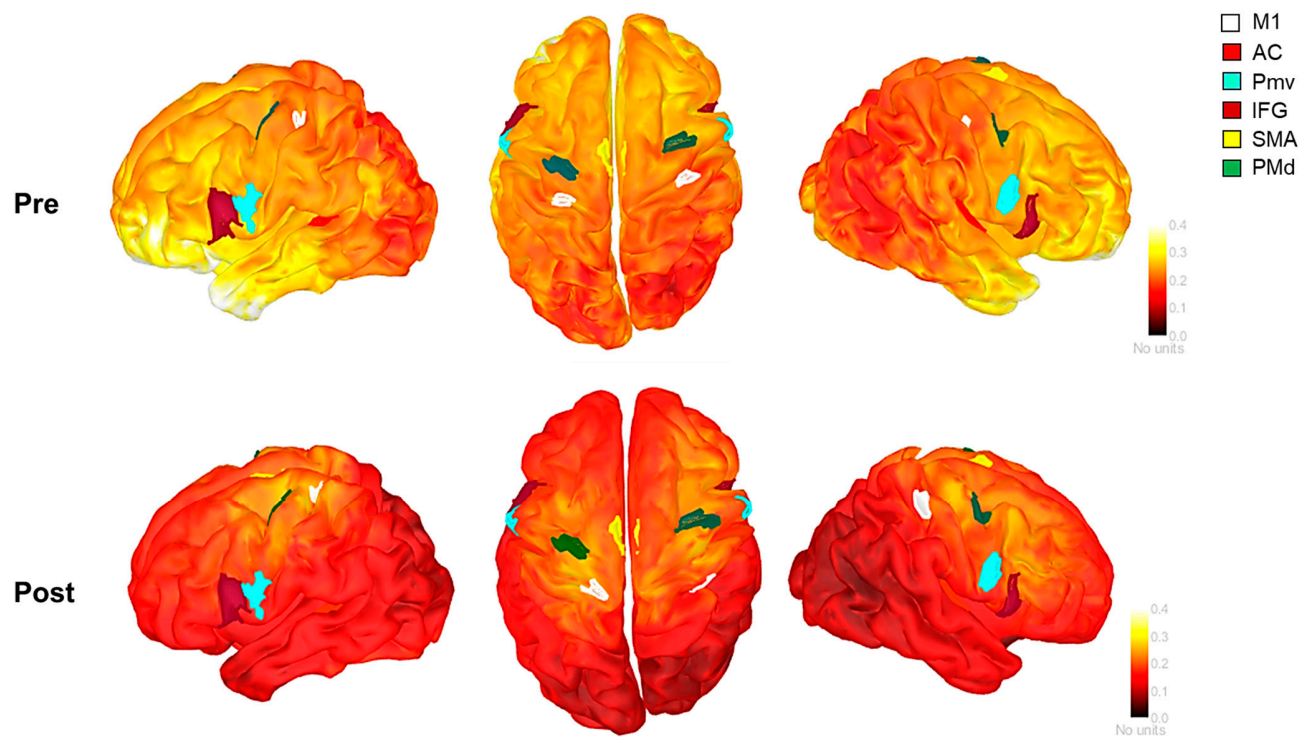

Figure S3. Relative power spectrum density maps for  $\beta$ -band in Participant 1. (M1: primary motor cortex, AC: auditory cortex, IFG: inferior frontal gyrus, SMA: supplementary motor area: PMv: premotor ventral cortex, PMd: premotor dorsal cortex, pre: before music support training, post: after music supported training, post-pre: difference in PSD for the post MST phase and the pre MST phase).

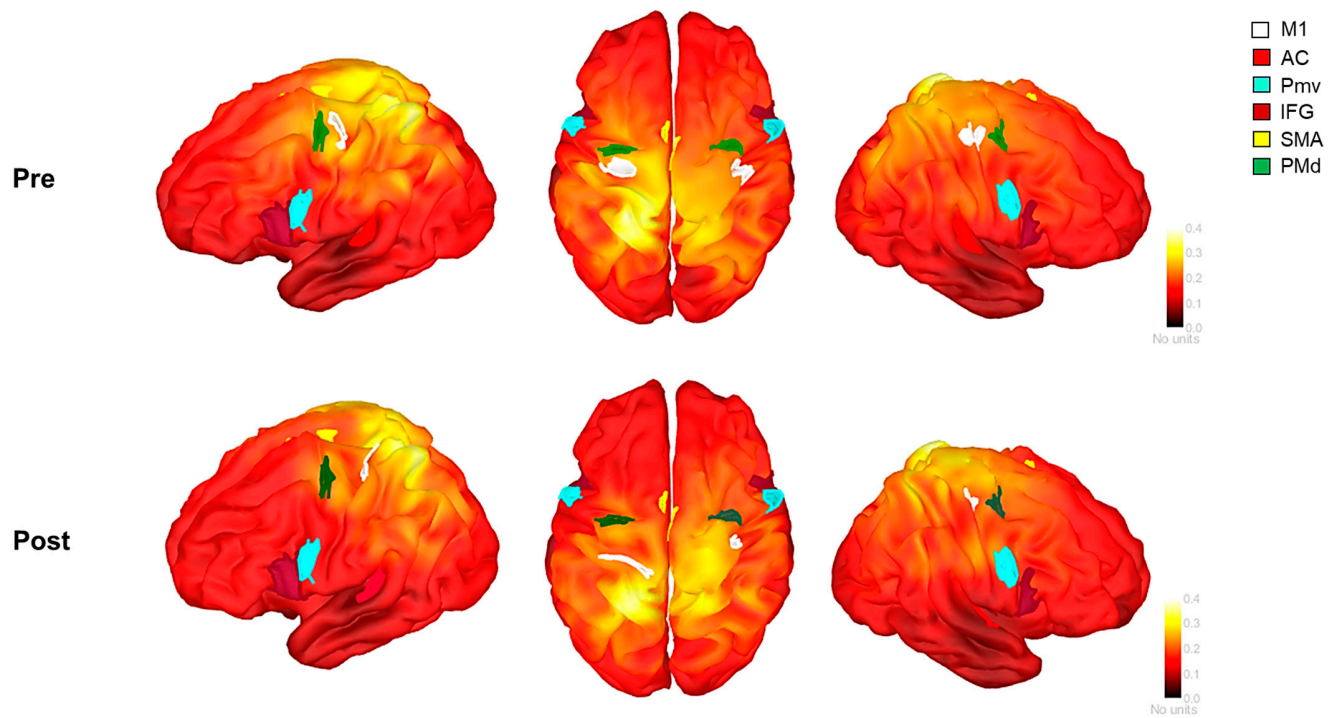

Figure S4. Relative power spectrum density maps for  $\beta$ -band in Participant 2. (M1: primary motor cortex, AC: auditory cortex, IFG: inferior frontal gyrus, SMA: supplementary motor area: PMv: premotor ventral cortex, PMd: premotor dorsal cortex, pre: before music support training, post: after music supported training, post-pre: difference in PSD for the post MST phase and the pre MST phase).

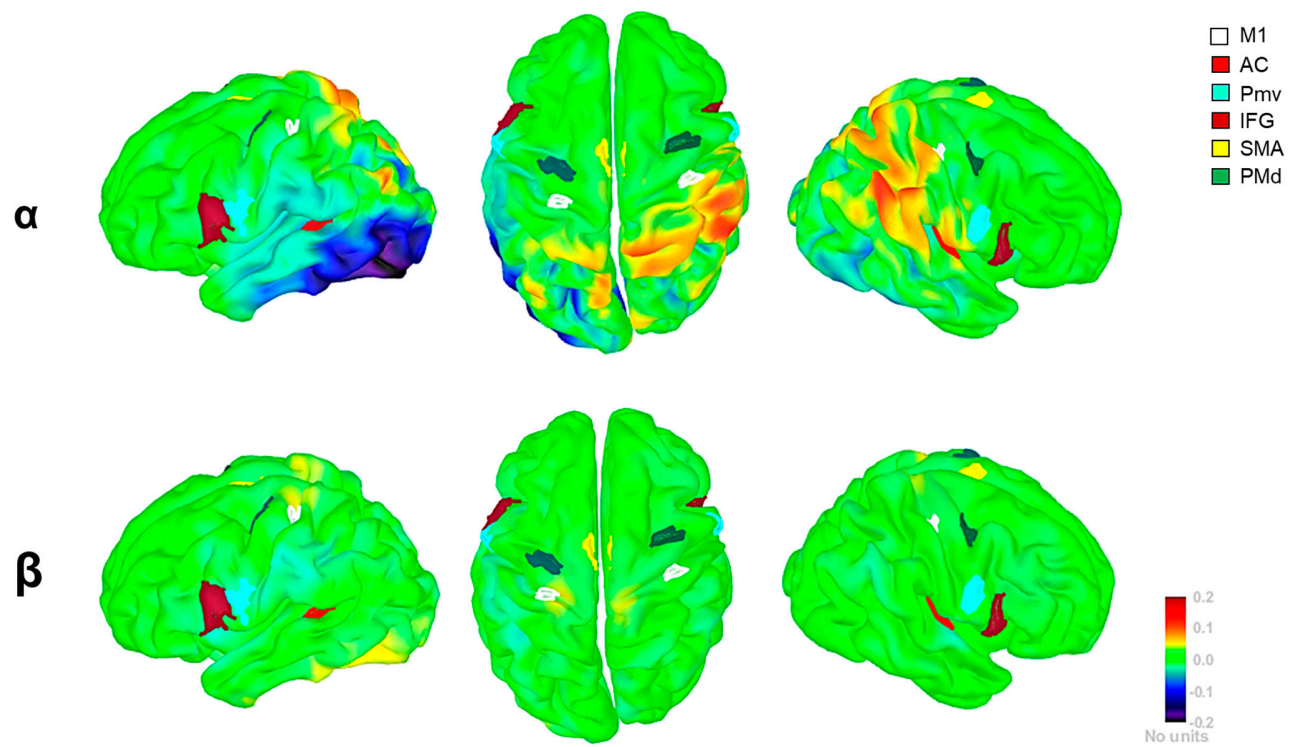

Figure S5. Relative power spectrum density contrast maps for  $\alpha$ ,  $\beta$ -band in Participant 1. The maps represent a difference in between the post-MST and the pre-MST condition. (M1: primary motor cortex, AC: auditory cortex, IFG: inferior frontal gyrus, SMA: supplementary motor area: PMv: premotor ventral cortex, PMd: premotor dorsal cortex).



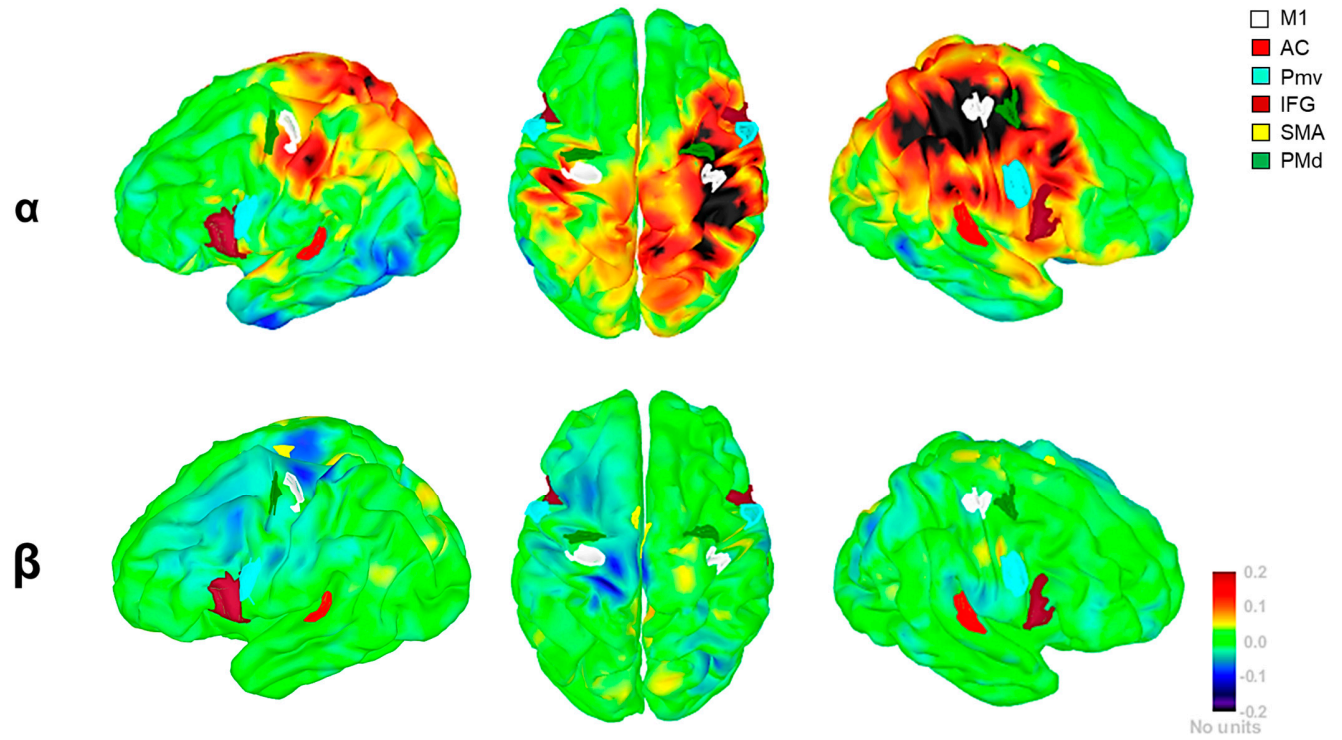

Figure S6. Relative power spectrum density contrast maps for  $\alpha$ ,  $\beta$ -band in Participant 2. The maps represent a difference in between the post-MST and the pre-MST condition. (M1: primary motor cortex, AC: auditory cortex, IFG: inferior frontal gyrus, SMA: supplementary motor area: PMv: premotor ventral cortex, PMd: premotor dorsal cortex).

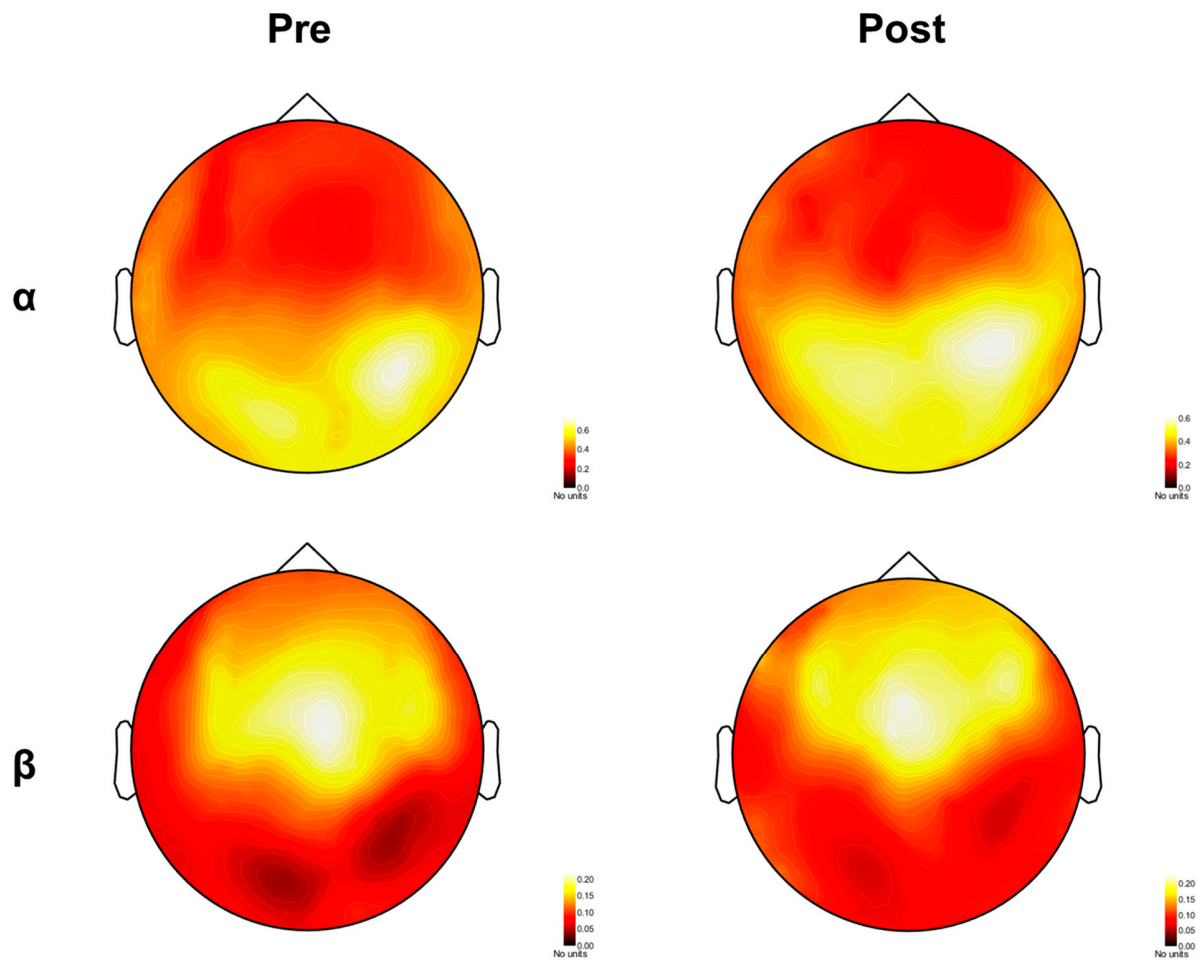

Figure S7. Relative power spectrum density contrast maps (MEG scalp distribution) for  $\alpha$ ,  $\beta$ -band in Participant 1. (pre: before music support training, post: after music supported training).

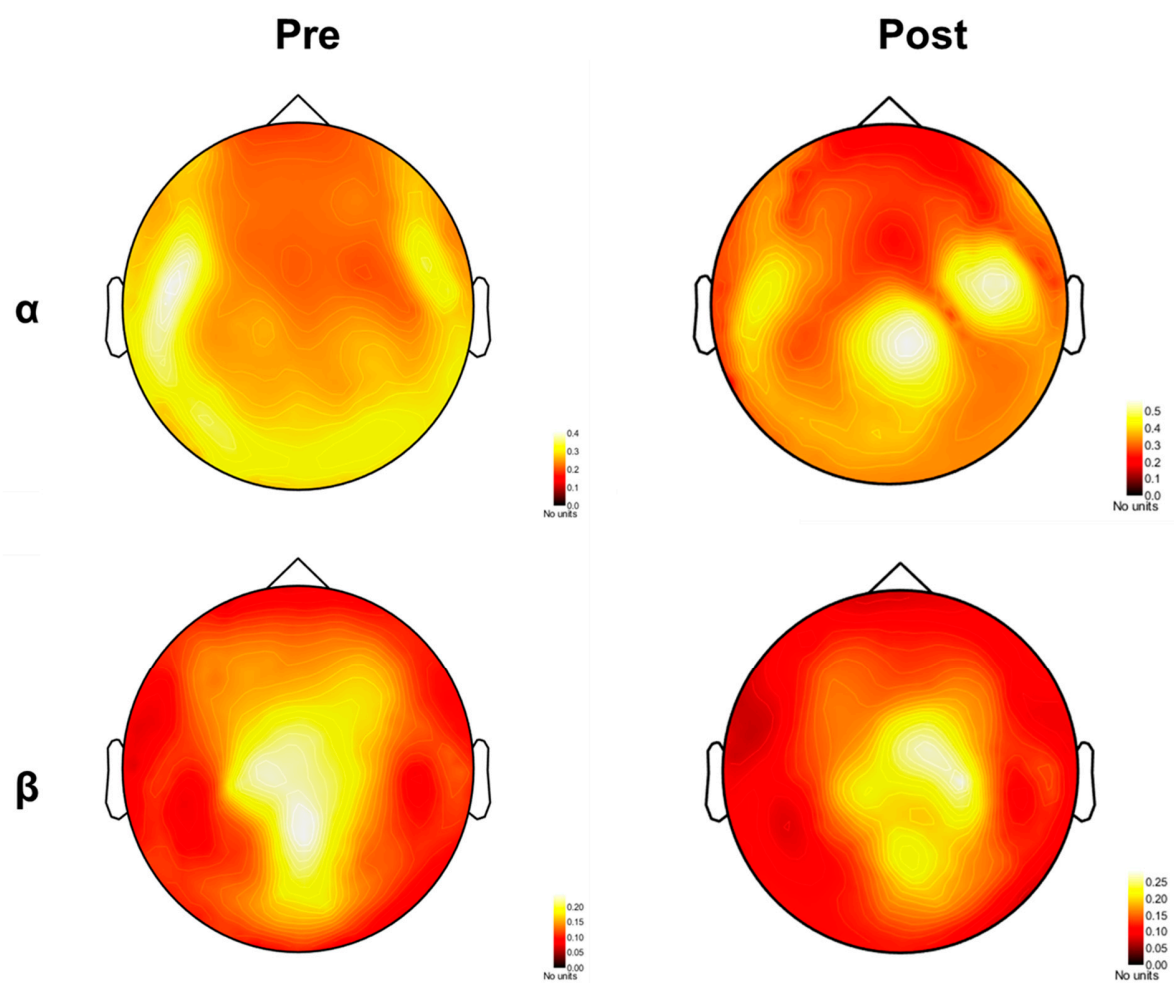

Figure S8. Relative power spectrum density contrast maps (MEG scalp distribution) for  $\alpha$ ,  $\beta$ -band in Participant 2. (pre: before music support training, post: after music supported training).



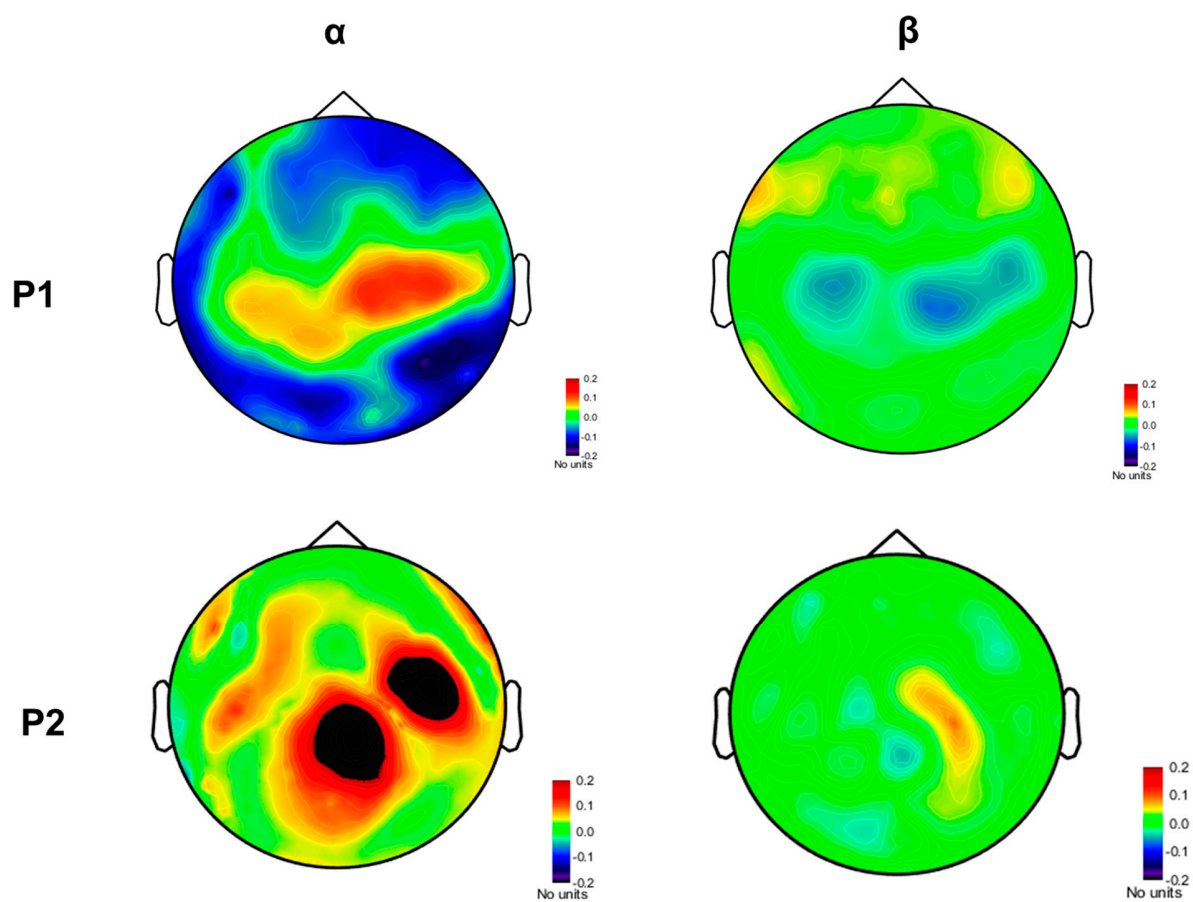

Figure S9. Relative power spectrum density contrast maps (MEG scalp distribution) for  $\alpha$ ,  $\beta$ -band in Participant 1 and 2. The topographies represent a difference in between the post-MST and the pre-MST condition. (P1: participant 1, P2: participant 2).
